# Supplementary material
Source: bioRxiv or medRxiv preprint supplement (https://www.biorxiv.org/highwire/filestream/34481/field_highwire_adjunct_files/0/117978-1.pdf)

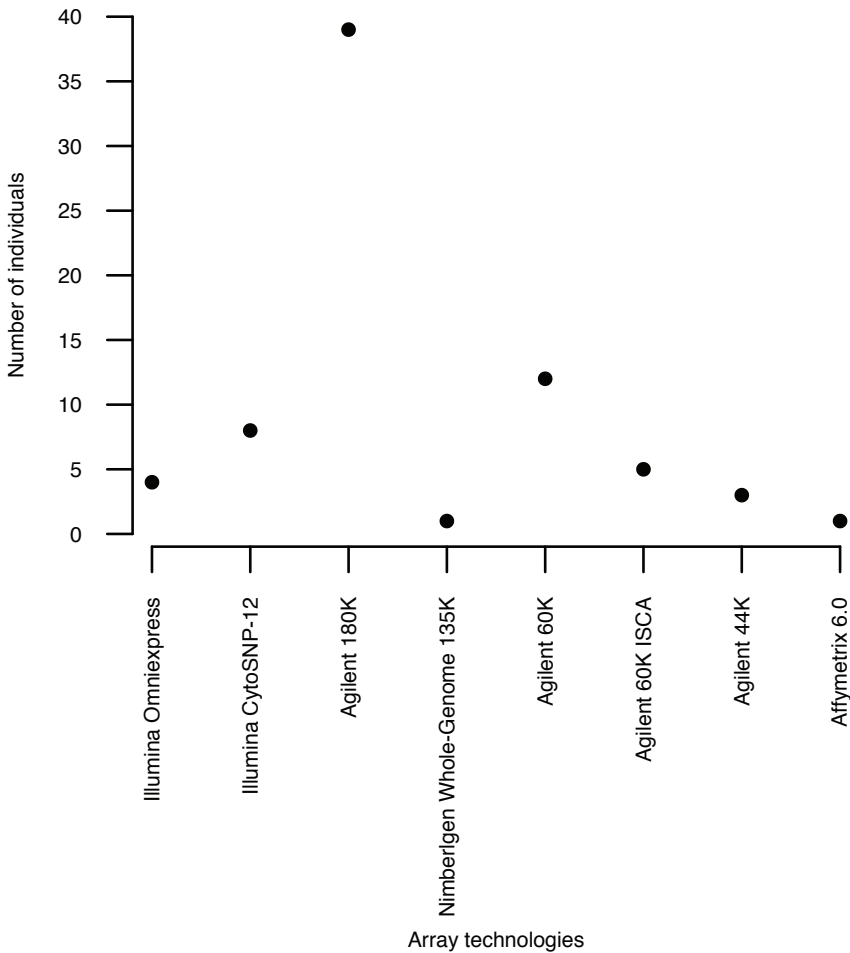

### Small CNVs

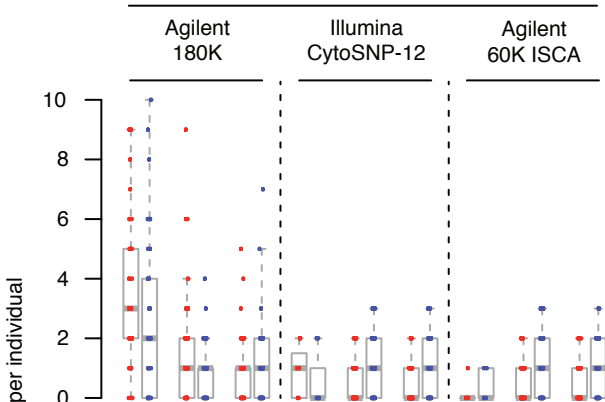

### Small CNVs incl. NP-genes

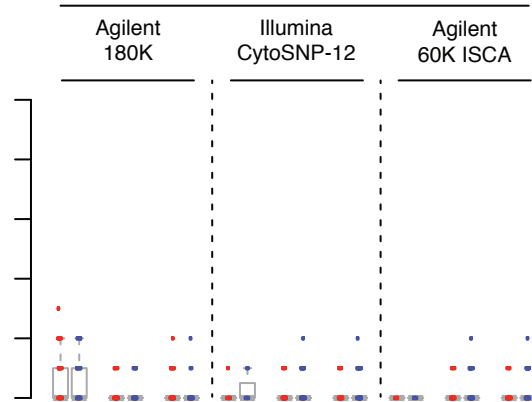

### Large CNVs

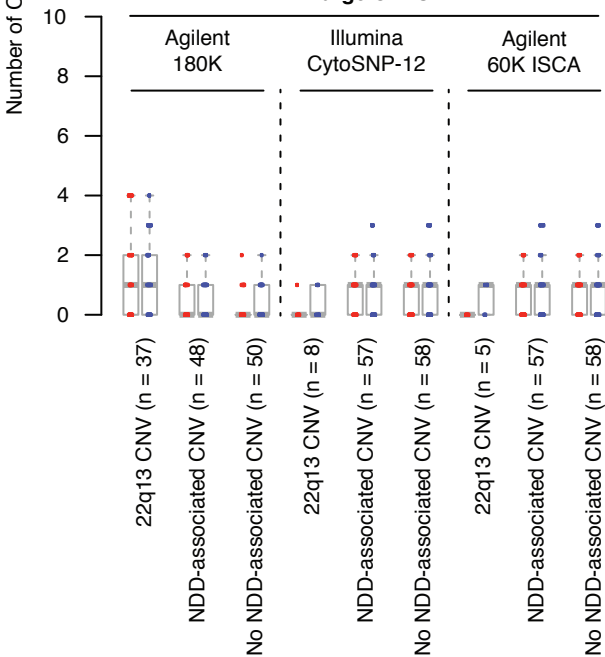

### Large CNVs incl. NP-genes

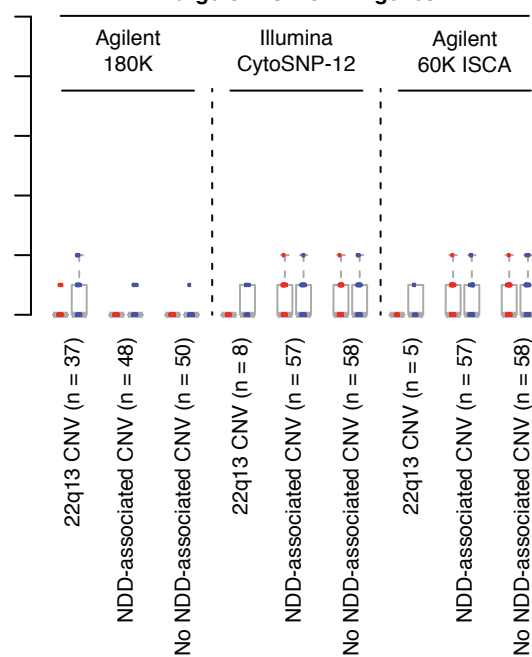

• Deletions  
• Duplications

Normal corpus callosum

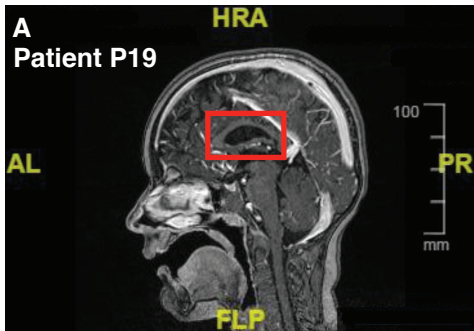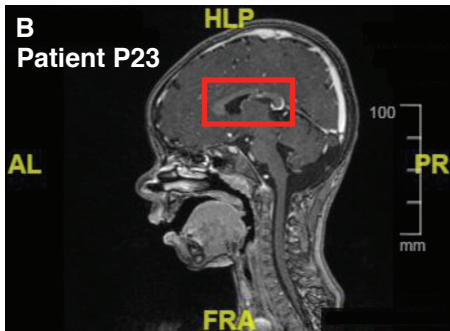

Abnormal corpus callosum

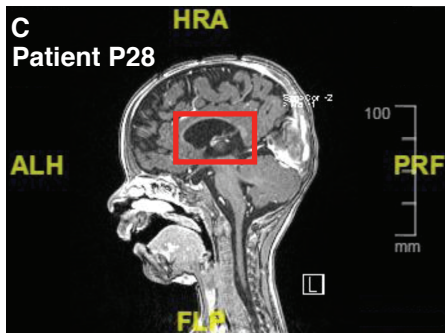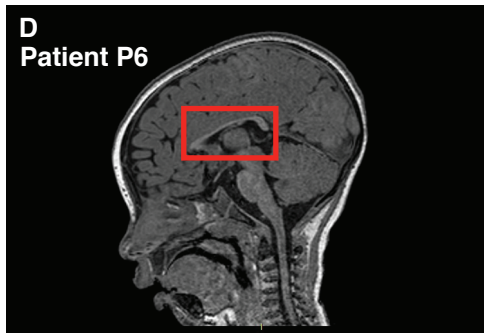

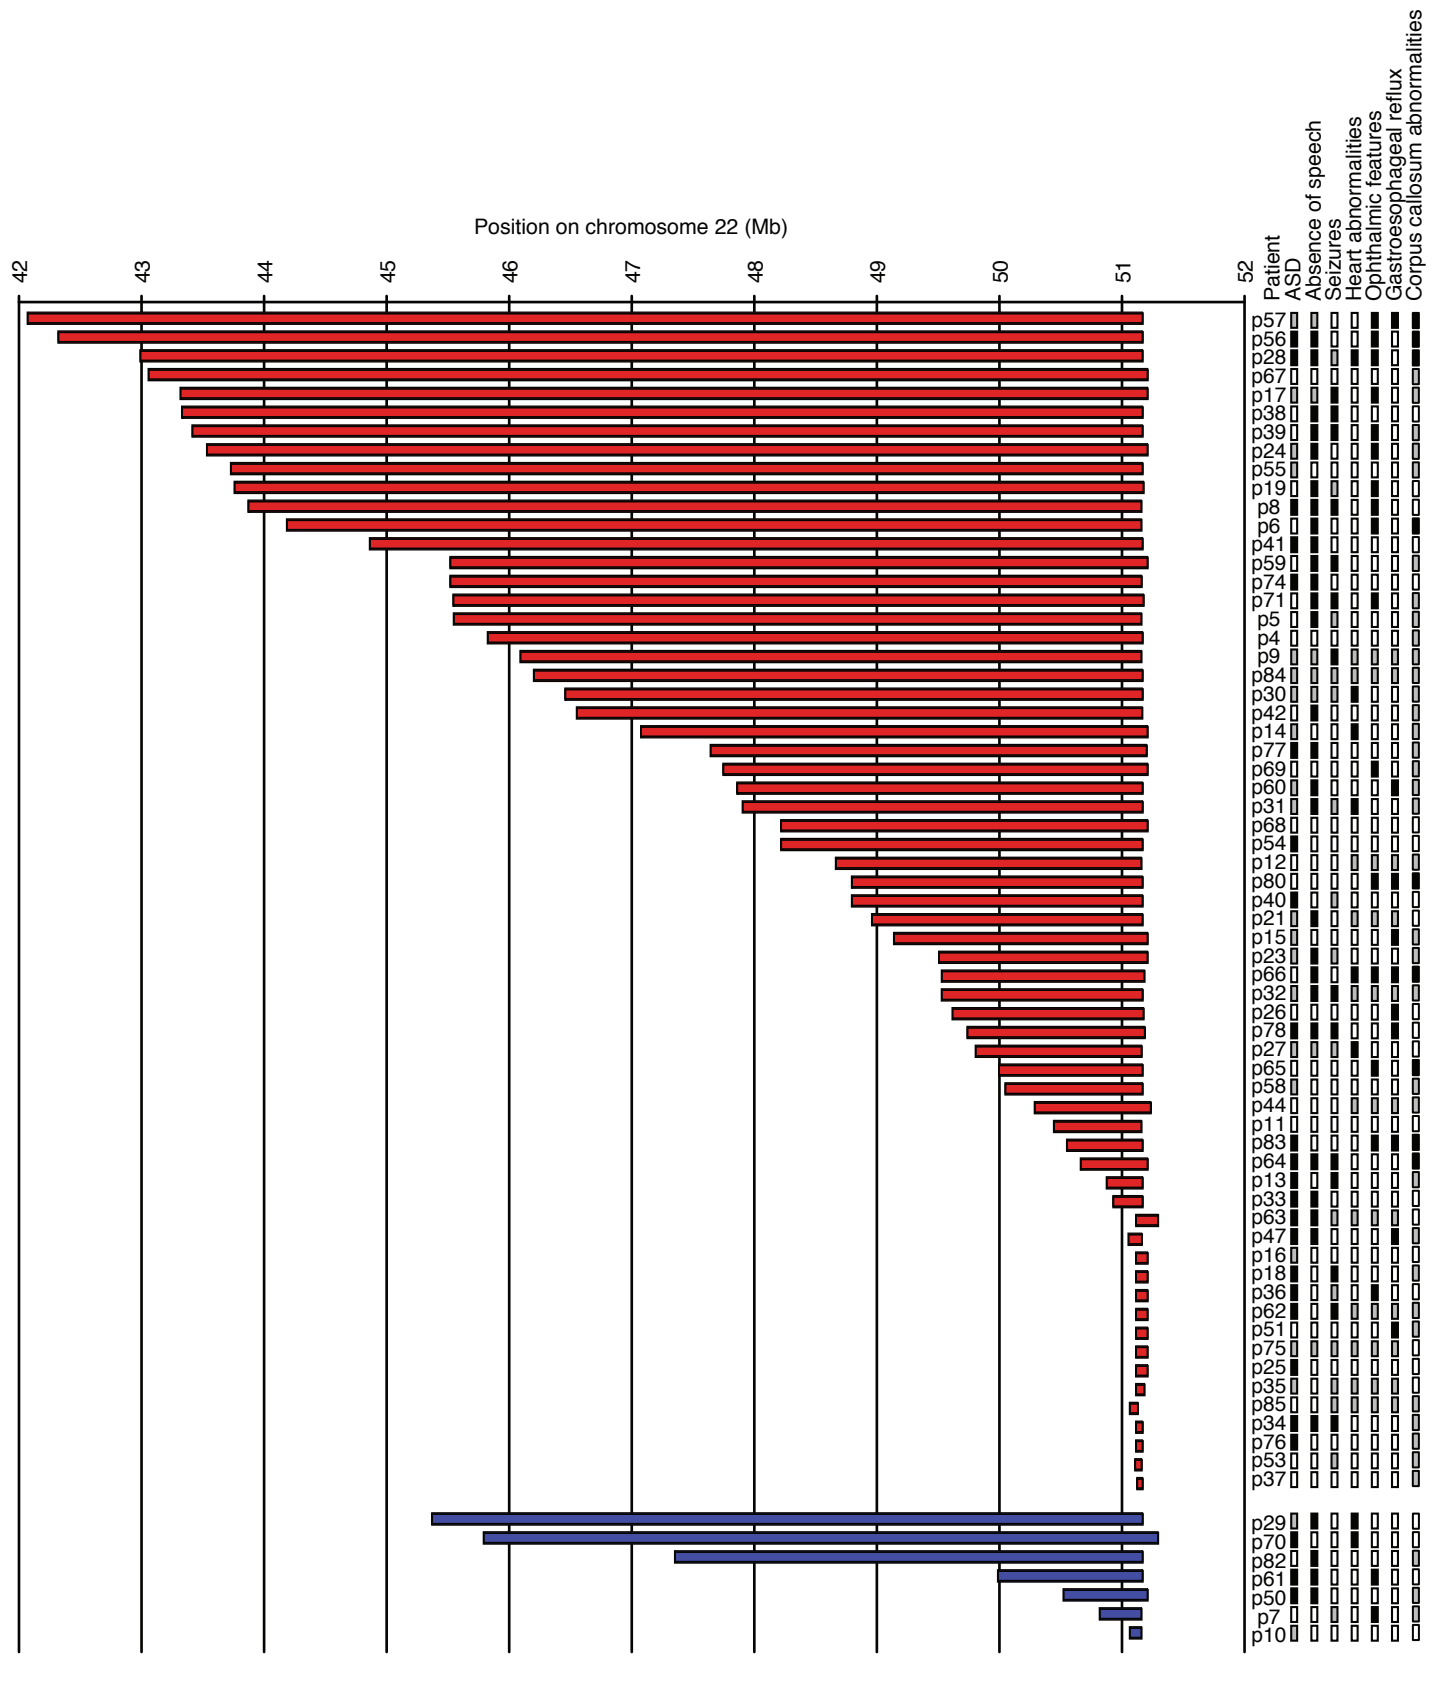



**A**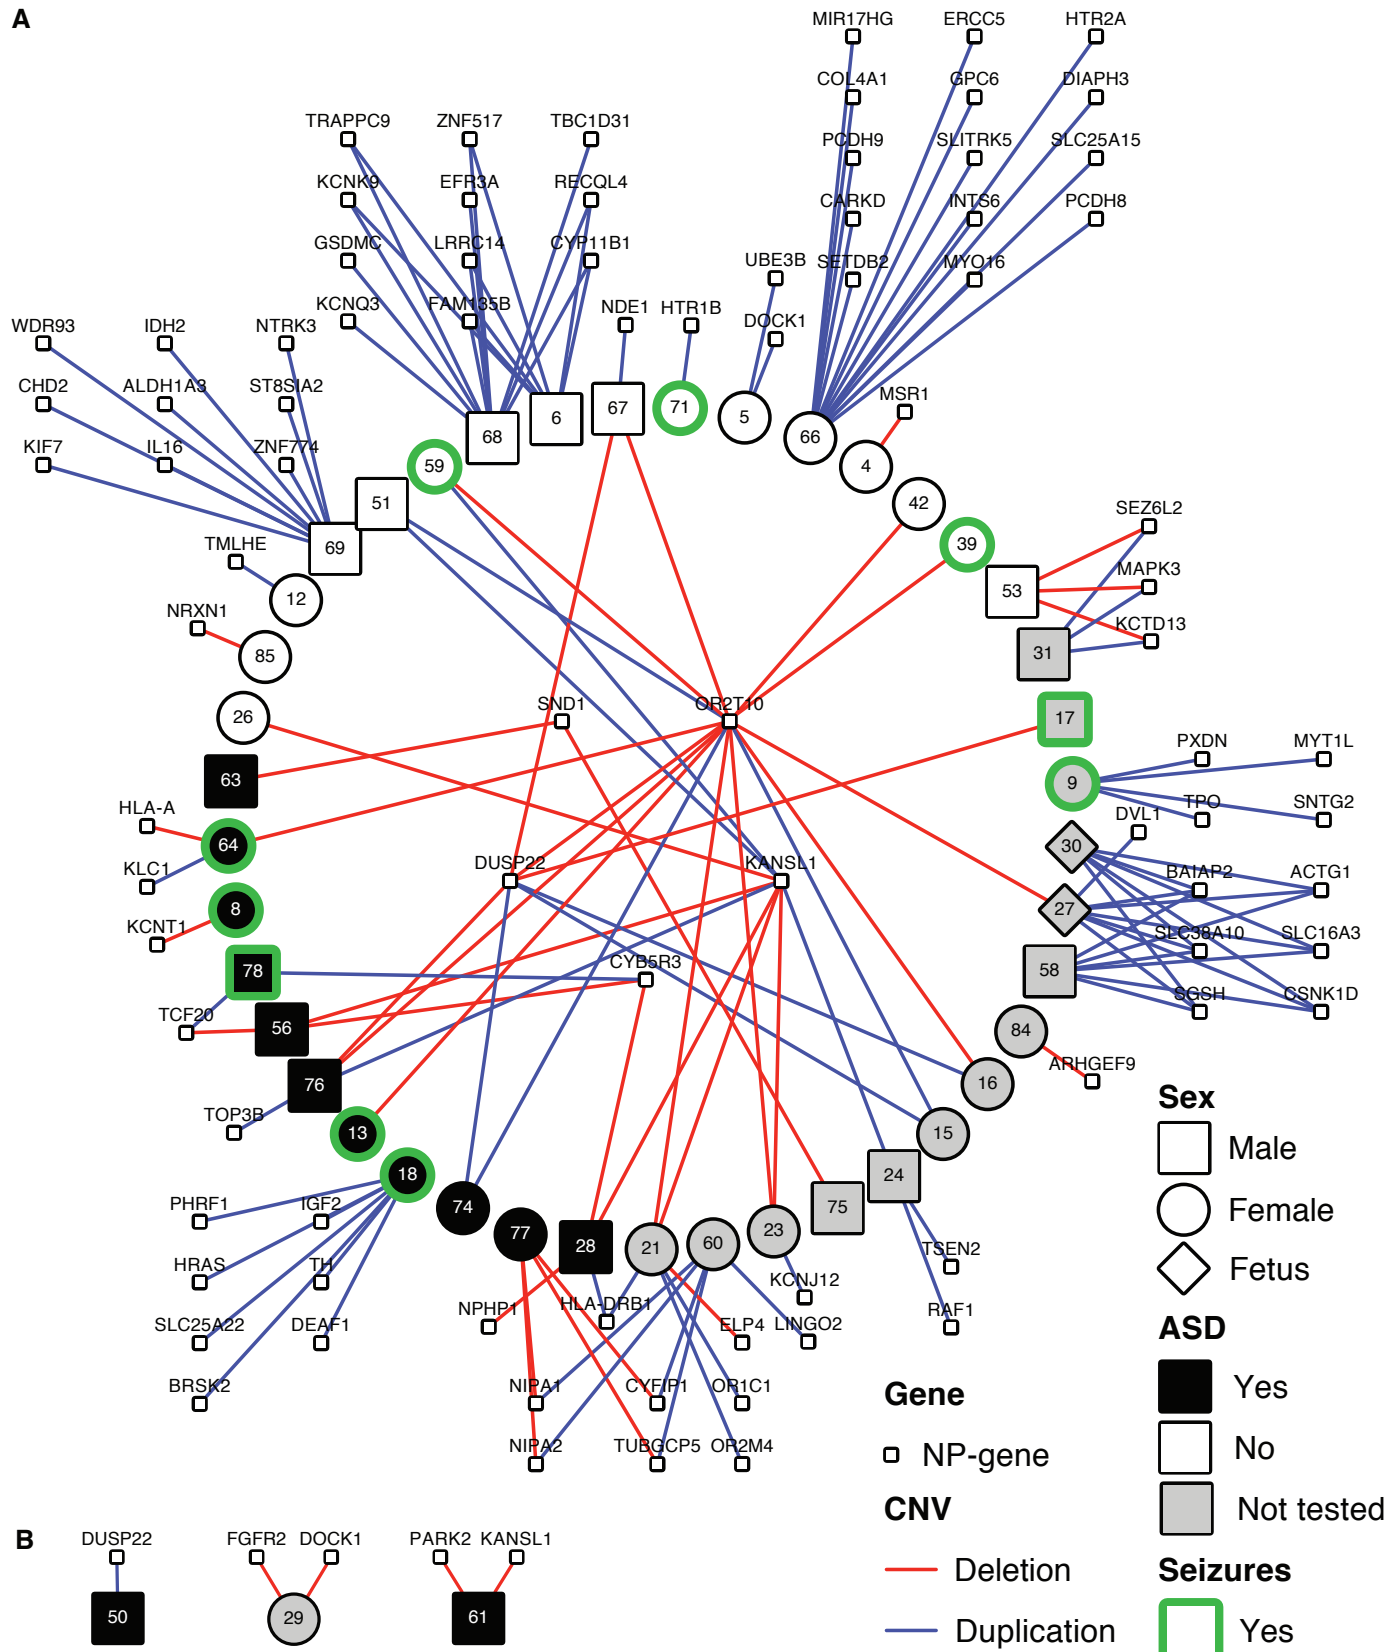**B**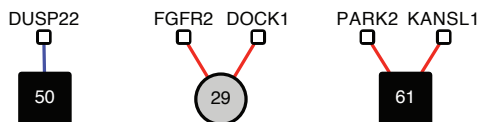

Supplement: Supplementary file [file 117978-1.pdf]
